# Supplementary material for: Paternal restraint stress affects offspring metabolism via ATF-2 dependent mechanisms in Drosophila melanogaster germ cells
Source: PubMed Central journal article supplement (PMC7198565; doi:10.1038/s42003-020-0935-z), 2020-05-04
Supplement: 42003_2020_935_MOESM2_ESM.pdf [file 42003_2020_935_MOESM2_ESM.pdf]

**Supplementary Data 1. Source data for figures.**

Excel file containing source data for all main and supplementary figures.
